# Supplementary material for: Screening of bacteria-binding peptides and one-pot ZnO surface modification for bacterial cell entrapment
Source: Royal Society of Chemistry journal article supplement (doi:10.1039/c7ra12302g), 2018-01-01
Supplement: c7ra12302g1.pdf [file c7ra12302g1.pdf]

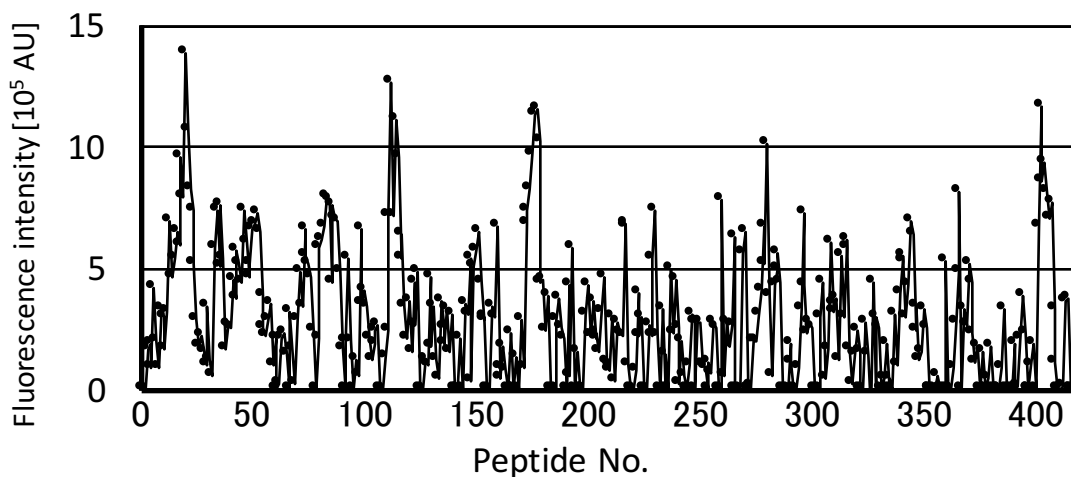

**Supplemental Figure 1**

**Screening for *E. coli* binding peptides using a peptide array comprised of a peptide library designed based on the amino acid sequence of the TLR4 protein.**

Fluorescent intensity profile of each peptide spot following the binding assay with *E. coli* cells; the fluorescent intensity in the absence of *E. coli* cells was subtracted from each sample.
